# Supplementary material for: Modeling biochar effects on soil organic carbon on croplands in the MIMICS (MIcrobial-MIneral Carbon Stabilization) model
Source: Copernicus journal article supplement (doi:10.5194/gmd-2023-114), 2023-07-10
Supplement: Supplementary file 2 [file gmd-2023-114-supplement.pdf]

**Table S1** Definitions, values and units of parameters in MIMICS.

| Parameter                                 | Description                                             | Value                                                                                                                                                      | Unit                                                               |
|-------------------------------------------|---------------------------------------------------------|------------------------------------------------------------------------------------------------------------------------------------------------------------|--------------------------------------------------------------------|
| <b>Carbon pools</b>                       |                                                         |                                                                                                                                                            |                                                                    |
| $LIT_m$                                   | Metabolic litter pool                                   | -                                                                                                                                                          | mg C cm <sup>-3</sup>                                              |
| $LIT_s$                                   | Structural litter pool                                  | -                                                                                                                                                          | mg C cm <sup>-3</sup>                                              |
| $MIC_r$                                   | Microorganism with copiotrophic growth strategy         | -                                                                                                                                                          | mg C cm <sup>-3</sup>                                              |
| $MIC_k$                                   | Microorganism with oligotrophic growth strategy         | -                                                                                                                                                          | mg C cm <sup>-3</sup>                                              |
| $SOC_p$                                   | Physically-protected SOC pool                           | -                                                                                                                                                          | mg C cm <sup>-3</sup>                                              |
| $SOC_c$                                   | Chemical protected SOC pool                             | -                                                                                                                                                          | mg C cm <sup>-3</sup>                                              |
| $SOC_a$                                   | Available SOC pool                                      | -                                                                                                                                                          | mg C cm <sup>-3</sup>                                              |
| <b>Litter input parameters</b>            |                                                         |                                                                                                                                                            |                                                                    |
| $f_{met}$                                 | Partitioning of litter inputs to $LIT_m$                | 0.85-0.013 (lignin/N)                                                                                                                                      | -                                                                  |
| $f_{i,met}$                               | Fraction of litter inputs transferred to $SOC_p$        | 0.05                                                                                                                                                       | -                                                                  |
| $f_{i,STRU}$                              | Fraction of litter inputs transferred to $SOC_c$        | 0.05                                                                                                                                                       | -                                                                  |
| <b>Microbial decomposition parameters</b> |                                                         |                                                                                                                                                            |                                                                    |
| $V_{max}$                                 | Microbial maximum reaction velocity                     | -                                                                                                                                                          | mg C (mg MIC) <sup>-1</sup> h <sup>-1</sup>                        |
| $K_m$                                     | Half-saturation constant                                | -                                                                                                                                                          | mg C cm <sup>-3</sup>                                              |
| $V_{slope}$                               | Regression coefficient (Eq. 2)                          | 0.063 <sup>a</sup>                                                                                                                                         | ln (mg C (mg MIC) <sup>-1</sup> h <sup>-1</sup> ) °C <sup>-1</sup> |
| $V_{int}$                                 | Regression intercept (Eq. 2)                            | 5.47 <sup>a</sup>                                                                                                                                          | ln (mg C (mg MIC) <sup>-1</sup> h <sup>-1</sup> )                  |
| $av$                                      | Tuning coefficient (Eq. 2)                              | 8 × 10 <sup>-6</sup> <sup>a</sup>                                                                                                                          | -                                                                  |
| $V_{mod-r}$                               | Modifies $V_{max}$ for fluxes into $MIC_r$              | 10, 2, 10 <sup>b</sup>                                                                                                                                     | -                                                                  |
| $V_{mod-k}$                               | Modifies $V_{max}$ for fluxes into $MIC_k$              | 3,3,2 <sup>c</sup>                                                                                                                                         | -                                                                  |
| $K_{slope}$                               | Regression coefficient (Eq. 3)                          | 0.017, 0.027, 0.017 <sup>b,c</sup>                                                                                                                         | ln (mg C cm <sup>-3</sup> ) °C <sup>-1</sup>                       |
| $K_{int}$                                 | Regression intercept (Eq. 3)                            | 3.19 <sup>a</sup>                                                                                                                                          | ln (mg C cm <sup>-3</sup> )                                        |
| $ak$                                      | Tuning coefficient (Eq. 3)                              | 10 <sup>a</sup>                                                                                                                                            | -                                                                  |
| $K_{mod-r}$                               | Modifies $K_m$ for fluxes into $MIC_r$                  | 0.125, 0.5, 0.25 × $P_{scalar}$ <sup>b</sup>                                                                                                               | -                                                                  |
| $K_{mod-k}$                               | Modifies $K_m$ for fluxes into $MIC_k$                  | 0.5, 0.25, 0.167 × $P_{scalar}$ <sup>c</sup>                                                                                                               | -                                                                  |
| $P_{scalar}$                              | Physical protection scalar used in $K_{mod}$            | $(2.0 \times (2.0 \times e^{-2\sqrt{f_{clay}}})^{-1}$                                                                                                      | -                                                                  |
| $MGE$                                     | Microbial growth efficiency                             | 0.5, 0.25, 0.7, 0.35 <sup>d</sup>                                                                                                                          | mg mg <sup>-1</sup>                                                |
| $k_{mic}$                                 | Microbial biomass turnover rate                         | $5.2 \times 10^{-4} \times e^{0.3(f_{met})} \times \tau_{mod}$ <sup>e</sup><br>$2.4 \times 10^{-4} \times e^{0.1(f_{met})} \times \tau_{mod}$ <sup>e</sup> | h <sup>-1</sup>                                                    |
| $\tau_{mod}$                              | Modifies microbial turnover rate                        | $0.8 < \sqrt{NPP/100} < 1.2$                                                                                                                               | -                                                                  |
| $a_\tau$                                  | Tuning coefficient of $K_{mic}$                         | 1.0                                                                                                                                                        | -                                                                  |
| $f_{rp}$                                  | Fraction of $K_{mic}$ of $MIC_r$ partitioned to $SOC_p$ | $\min(1.0, 0.13 \times e^{1.3(f_{clay})}$ <sup>f</sup>                                                                                                     | -                                                                  |
| $f_{kp}$                                  | Fraction of $K_{mic}$ of $MIC_k$ partitioned to $SOC_p$ | $\min(1.0, 0.02 \times e^{0.8(f_{clay})}$ <sup>f</sup>                                                                                                     | -                                                                  |
| $f_{rc}$                                  | Fraction of $K_{mic}$ of $MIC_r$ partitioned to $SOC_c$ | $\min(1.0 - f_{rp}, 1.06 \times e^{-2.6(f_{met})}$ <sup>f</sup>                                                                                            | -                                                                  |
| $f_{kc}$                                  | Fraction of $K_{mic}$ of $MIC_k$ partitioned to $SOC_c$ | $\min(1.0 - f_{kp}, 8.93 \times e^{-2.6(f_{met})}$ <sup>f</sup>                                                                                            | -                                                                  |
| $f_{ra}$                                  | Fraction of $K_{mic}$ of $MIC_r$ partitioned to $SOC_a$ | $1.0 - f_{rp} - f_{rc}$                                                                                                                                    | -                                                                  |
| $f_{ka}$                                  | Fraction of $K_{mic}$ of $MIC_k$ partitioned to $SOC_a$ | $1.0 - f_{kp} - f_{kc}$                                                                                                                                    | -                                                                  |
| $\beta$                                   | Density-dependence exponent in Eq. 6                    | -                                                                                                                                                          | -                                                                  |
| <b>Protected carbon parameters</b>        |                                                         |                                                                                                                                                            |                                                                    |
| $D$                                       | Deprotection rate from $SOM_p$ to $SOM_a$               | Eq. 5                                                                                                                                                      | h <sup>-1</sup>                                                    |
| $KO$                                      | Further modifies $K_m$ for oxidation of $SOM_c$         | 4, 4 <sup>e</sup>                                                                                                                                          | -                                                                  |
| $k_d$                                     | Tuning coefficient of the deprotection rate             | -                                                                                                                                                          | -                                                                  |
| $K_{ads}$                                 | The sorption rate of $SOC_p$ in Eq. 8                   | Eq. 8                                                                                                                                                      | h <sup>-1</sup>                                                    |
| $k_{ba}$                                  | The binding affinity in Eq. 8                           | 1~16 <sup>g</sup>                                                                                                                                          | (mg C mg <sup>-3</sup> ) <sup>-1</sup>                             |
| $Q_{max}$                                 | The maximum sorption capacity of $SOC_p$                | Eq. 9                                                                                                                                                      | mg C cm <sup>-3</sup>                                              |

| Parameter                         | Description                                                                                          | Value                    | Unit                 |
|-----------------------------------|------------------------------------------------------------------------------------------------------|--------------------------|----------------------|
| <b>Biochar-related parameters</b> |                                                                                                      |                          |                      |
| $f_{bp}$                          | Fraction of biochar carbon partitioned into SOC <sub>p</sub>                                         | 0.6                      | -                    |
| $f_{ba}$                          | Fraction of biochar carbon partitioned into SOC <sub>a</sub>                                         | 0.03-0.3 <sup>h</sup>    | -                    |
| $f_{bc}$                          | Fraction of biochar carbon partitioned into SOC <sub>c</sub>                                         | $1.0 - f_{bp} - f_{ba}$  | -                    |
| $f_{loss}$                        | Biochar fraction loss during addition                                                                |                          |                      |
| $f_d$                             | Coefficients for adjusting the deprotection rate of SOC <sub>p</sub> with biochar addition in Eq. 15 | -0.15 ~0.15 <sup>h</sup> | ha t <sup>-1</sup> C |
| $f_v$                             | Coefficients for adjusting the microbial decomposition velocity with biochar addition in Eq. 16      | -0.15 ~0.15 <sup>h</sup> | ha t <sup>-1</sup> C |

<sup>a</sup> From observations in German et al. (2012), as used in Wieder et al. (2014, 2015).

<sup>b</sup> For LIT<sub>m</sub>, LIT<sub>s</sub>, and SOC<sub>a</sub>, fluxes entering MIC<sub>r</sub>, respectively.

<sup>c</sup> For LIT<sub>m</sub>, LIT<sub>s</sub>, and SOC<sub>a</sub>, fluxes entering MIC<sub>k</sub>, respectively.

5 <sup>d</sup> 0.5 is the MGE of C fluxes from LIT<sub>m</sub> and SOC<sub>a</sub> to MIC<sub>r</sub>, 0.25 is for C flux from LIT<sub>s</sub> to MIC<sub>r</sub>, 0.7 is for fluxes from LIT<sub>s</sub> and SOC<sub>a</sub> to MIC<sub>k</sub>, 0.35 is for C flux from LIT<sub>m</sub> to MIC<sub>k</sub>.

<sup>e</sup> For MIC<sub>r</sub> and MIC<sub>k</sub>, respectively.

<sup>f</sup> Values from Zhang et al. (2020).

<sup>g</sup> Values from Wang et al. (2020).

10 <sup>h</sup> Ranges from Archontoulis et al. (2016).

15

20

25

**Table S2** The modifications for various MIMICS versions.

|           | <b>Model</b>            | <b>Description</b>                                                                                                                 |
|-----------|-------------------------|------------------------------------------------------------------------------------------------------------------------------------|
| MIMICS    | MIMICS-def              | The default model version with modified parameters related to crop properties (Section 2.2.5).                                     |
|           | MIMICS-T                | Considering the density-dependent microbial turnover rate (denoted as “T”, Eq. 6).                                                 |
|           | MIMICS-TS               | Adding the sorption process of SOC <sub>p</sub> based on MIMICS-T (“S”, Eq. 7-9).                                                  |
|           | MIMICS-TSM <sub>a</sub> | Including soil moisture effects from CENTURY model (“M <sub>a</sub> ”) based on MIMICS-TS.                                         |
|           | MIMICS-TSM <sub>b</sub> | Including soil moisture effects from ORCHIDEE-SOM model (“M <sub>b</sub> ”) based on MIMICS-TS.                                    |
|           | MIMICS-TSM <sub>c</sub> | Including soil moisture effects from Yan et al. (2018) (“M <sub>c</sub> ”) based on MIMICS-TS.                                     |
| MIMICS-BC | MIMICS-TSM <sub>b</sub> | Including both the sorption process and soil moisture effects but without biochar related parameters for biochar addition.         |
|           | MIMICS-BC <sub>D</sub>  | Including biochar effects on SOC by modifying deprotection rate of SOC <sub>p</sub> in the MIMICS-TSM <sub>b</sub> (Eq. 15).       |
|           | MIMICS-BC <sub>DV</sub> | Including further biochar effects on SOC by modifying the microbial maximum reaction velocity in MIMICS-TSM <sub>b</sub> (Eq. 16). |

30

**Table S3** Definitions and values of modified parameters used in default MIMICS.

| Parameters <sup>d</sup> | Description                             | Original values <sup>a</sup> | Modified values   |
|-------------------------|-----------------------------------------|------------------------------|-------------------|
| cn_leaf                 | The ratio of carbon to nitrogen in leaf | 30                           | 25 <sup>b</sup>   |
| cn_root                 | The ratio of carbon to nitrogen in root | 75                           | 45 <sup>b</sup>   |
| cn_wood                 | The ratio of carbon to nitrogen in wood | 200                          | 50 <sup>b</sup>   |
| lig_c_leaf              | The ratio of lignin to carbon in leaf   | 0.1                          | 0.12 <sup>b</sup> |
| lig_c_root              | The ratio of lignin to carbon in root   | 0.1                          | 0.40 <sup>b</sup> |
| lig_c_wood              | The ratio of lignin to carbon in wood   | 0.15                         | 0.15 <sup>b</sup> |
| HI                      | Harvest index                           | -                            | 0.45 <sup>c</sup> |

35 <sup>a</sup> Values based on Zhang et al. (2020).<sup>b</sup> Estimated values from Abiven et al. (2005).<sup>c</sup> From value in Hicke & Lobell (2004).<sup>d</sup> These parameters were assumed unchanged with biochar addition.

40

**Table S4** Prior parameter values, optimized values and ranges in the parameter optimization for various MIMICS versions.

| Datasets                | Model                   | Parameter | Prior value | Optimized value                              | Range <sup>c</sup> | Units                |
|-------------------------|-------------------------|-----------|-------------|----------------------------------------------|--------------------|----------------------|
| MIMICS<br>(58 sites)    | MIMICS-def              | $a_v$     | 10          | 13.05                                        | [0,30]             | -                    |
|                         |                         | $a_k$     | 5           | 11.70                                        | [0,20]             | -                    |
|                         |                         | $k_d$     | 0.5         | 0.94                                         | [0,3]              | -                    |
|                         | MIMICS-T                | $a_v$     | 10          | 8.97                                         | [0,30]             | -                    |
|                         |                         | $a_k$     | 5           | 16.43                                        | [0,20]             | -                    |
|                         |                         | $k_d$     | 0.5         | 1.82                                         | [0,3]              | -                    |
|                         |                         | $\beta$   | 1           | 1.66                                         | [0,2]              | -                    |
|                         | MIMICS-TS               | $a_v$     | 10          | 16.92                                        | [0,30]             | -                    |
|                         |                         | $a_k$     | 5           | 12.52                                        | [0,20]             | -                    |
|                         |                         | $k_d$     | 0.5         | 1.65                                         | [0,3]              | -                    |
|                         |                         | $\beta$   | 1           | 1.41                                         | [0,2]              | -                    |
|                         |                         | $k_{ba}$  | 6           | 5.07                                         | [1,16]             | -                    |
|                         |                         | $c_1$     | 0.3         | 0.52                                         | [0,0.8]            | -                    |
|                         |                         | $c_2$     | 3.0         | 3.7                                          | [0,5]              | -                    |
|                         | MIMICS-TSM <sub>a</sub> | $a_v$     | 10          | 11.75                                        | [0,30]             | -                    |
|                         |                         | $a_k$     | 5           | 10.07                                        | [0,20]             | -                    |
|                         |                         | $k_d$     | 0.5         | 1.39                                         | [0,3]              | -                    |
|                         |                         | $\beta$   | 1           | 1.50                                         | [0,2]              | -                    |
|                         |                         | $k_{ba}$  | 6           | 5.17                                         | [1,16]             | -                    |
|                         |                         | $c_1$     | 0.3         | 0.42                                         | [0,0.8]            | -                    |
|                         |                         | $c_2$     | 3           | 3.48                                         | [0,5]              | -                    |
| MIMICS-TSM <sub>b</sub> | $a_v$                   | 10        | 15.91       | [0,30]                                       | -                  |                      |
|                         | $a_k$                   | 5         | 13.10       | [0,20]                                       | -                  |                      |
|                         | $k_d$                   | 0.5       | 1.60        | [0,3]                                        | -                  |                      |
|                         | $\beta$                 | 1         | 1.47        | [0,2]                                        | -                  |                      |
|                         | $k_{ba}$                | 6         | 2.95        | [1,16]                                       | -                  |                      |
|                         | $c_1$                   | 0.3       | 0.51        | [0,0.8]                                      | -                  |                      |
|                         | $c_2$                   | 3         | 3.86        | [0,5]                                        | -                  |                      |
| MIMICS-TSM <sub>c</sub> | $a_v$                   | 10        | 17.50       | [0,30]                                       | -                  |                      |
|                         | $a_k$                   | 5         | 13.33       | [0,20]                                       | -                  |                      |
|                         | $k_d$                   | 0.5       | 1.13        | [0,3]                                        | -                  |                      |
|                         | $\beta$                 | 1         | 1.41        | [0,2]                                        | -                  |                      |
|                         | $k_{ba}$                | 6         | 4.17        | [1,16]                                       | -                  |                      |
|                         | $c_1$                   | 0.3       | 0.42        | [0,0.8]                                      | -                  |                      |
|                         | $c_2$                   | 3         | 3.65        | [0,5]                                        | -                  |                      |
| MIMICS-BC               | MIMICS-TSM <sub>b</sub> | none      | none        | none                                         | none               | none                 |
| (134 sites)             | MIMICS-BC <sub>D</sub>  | $f_d$     | -0.002      | -0.0038 <sup>a</sup> (-0.0131 <sup>b</sup> ) | [-0.15,0.15]       | ha t <sup>-1</sup> C |
|                         | MIMICS-BC <sub>DV</sub> | $f_d$     | -0.002      | -0.0083 <sup>a</sup> (-0.0095 <sup>b</sup> ) | [-0.15,0.15]       | ha t <sup>-1</sup> C |
|                         |                         | $f_v$     | 0.05        | 0.008 <sup>a</sup> (-0.0097 <sup>b</sup> )   | [-0.15,0.15]       | ha t <sup>-1</sup> C |

<sup>a</sup>The optimized parameter values using the short-term SOC data.

<sup>b</sup>The optimized parameter values using the long-term (extended to 8 yr) SOC data.

45 <sup>c</sup>The prescribed parameter ranges of  $a_v$ ,  $a_k$ ,  $k_d$ ,  $\beta$  are from Zhang et al. (2020).  $k_{ba}$  is from Wang et al. (2020).  $c_1$  and  $c_2$  are estimated from Mayes et al. (2012).  $f_d$  and  $f_v$  are from Archontoulis et al. (2016).

50

55

**Table S5** The MIMICS model performance with cross-validation.

| Dataset                           | Model                   | Train 80% (46 sites) |                               |        | Test 20% (12 sites) |                               |       |
|-----------------------------------|-------------------------|----------------------|-------------------------------|--------|---------------------|-------------------------------|-------|
|                                   |                         | R <sup>2</sup>       | RMSE<br>(g kg <sup>-1</sup> ) | AIC    | R <sup>2</sup>      | RMSE<br>(g kg <sup>-1</sup> ) | AIC   |
| This study<br>(total 58<br>sites) | MIMICS-def              | 0.39                 | 4.96                          | 153.33 | 0.34                | 5.06                          | 44.76 |
|                                   | MIMICS-T                | 0.49                 | 4.55                          | 147.21 | 0.33                | 5.04                          | 46.36 |
|                                   | MIMICS-TS               | 0.52                 | 4.42                          | 150.76 | 0.38                | 4.96                          | 52.14 |
|                                   | MIMICS-TSM <sub>b</sub> | 0.50                 | 4.54                          | 153.04 | 0.33                | 5.03                          | 52.63 |

60 Notes: RMSE is the root mean square error, AIC is the Akaike information criterion.

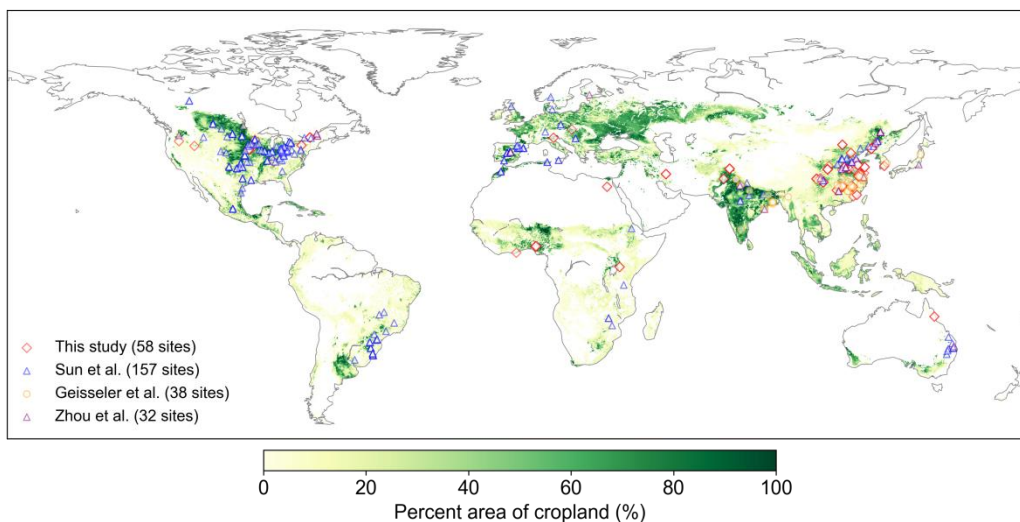

**Fig. S1** Locations of field cropland SOC measurements with or without biochar addition collected in this study and SOC measurements without biochar addition from Sun et al, (2020), Geisseier et al., (2017) and Zhou et al., (2017). Number of sites is also shown in the legend. Note that one site may have multiple paired SOC data due to various experimental conditions of biochar addition in our collected 58 sites. The cropland area percentage in each 10 km × 10 km grid cell is derived from EarthStat (<http://www.earthstat.org>; Ramankutty et al., 2008).

70

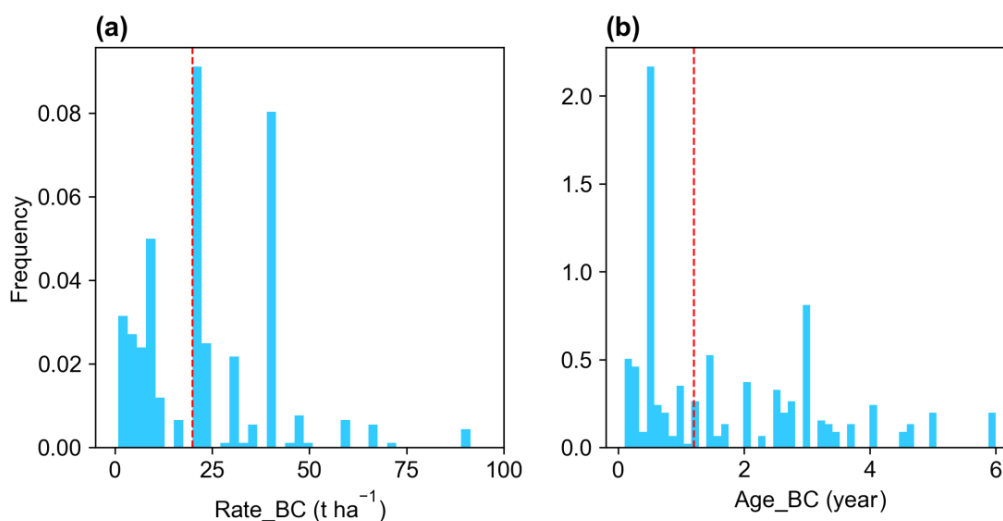

**Fig. S2** The frequency distribution of (a) biochar application rates (Rate\_BC) and (b) biochar addition periods (Age\_BC). Red dotted lines indicate the median values.

75

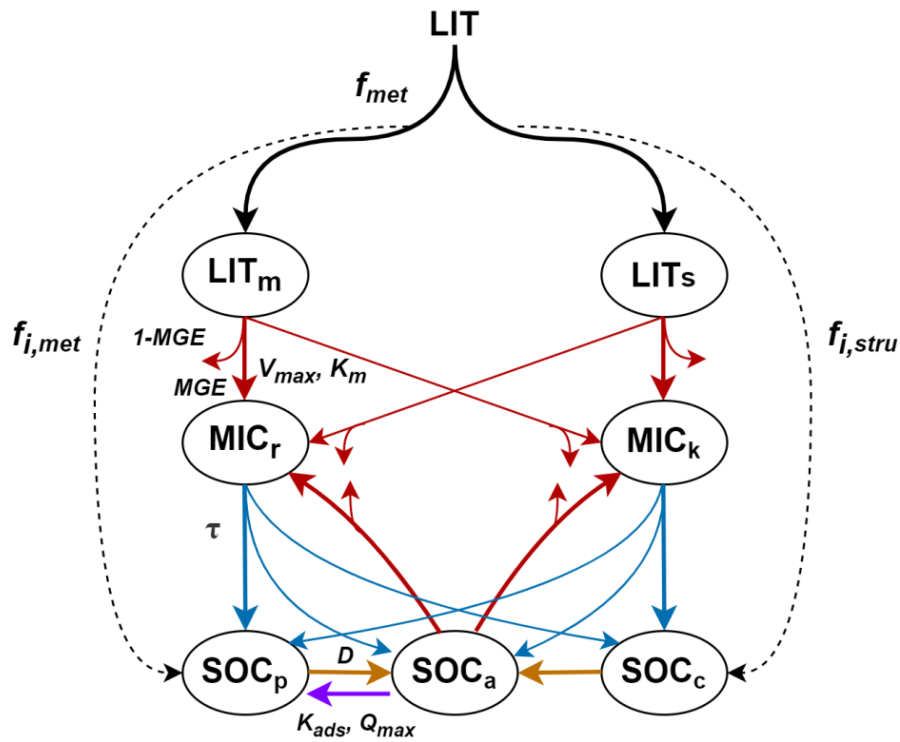

**Fig. S3** Framework of the MIMICS model (adapted from Wieder et al., 2015). The litter inputs (LIT) are divided into metabolic (LIT<sub>m</sub>) and structural litter pools (LIT<sub>s</sub>) according to the litter quality ( $f_{met}$ , i.e., fraction of litter to LIT<sub>m</sub>). Microbial growth efficiency (MGE) determines the carbon fluxes from the two litter pools and the available SOC pool (SOC<sub>a</sub>) into microbial biomass pools and heterotrophic respiration. The turnover of microbial biomass ( $\tau$ ) depends on the microbial functional types (MIC<sub>r</sub> and MIC<sub>k</sub> for r- and k-strategy). The three SOC pools represent the available, physically protected, and chemically recalcitrant SOC (SOC<sub>a</sub>, SOC<sub>p</sub>, and SOC<sub>c</sub>, respectively). SOC in the protected pools (i.e., SOC<sub>p</sub> and SOC<sub>c</sub>) are released to the available SOC pool (SOC<sub>a</sub>) over time (yellow arrow lines). The new added adsorption process associated with adsorption rate ( $K_{ads}$ ) and the maximum sorption capacity ( $Q_{max}$ ) from SOC<sub>a</sub> to SOC<sub>p</sub> are presented as the purple arrow lines.

80

85 Detailed description of model parameters and carbon fluxes can be found in Table S1 and Wieder et al. (2015).

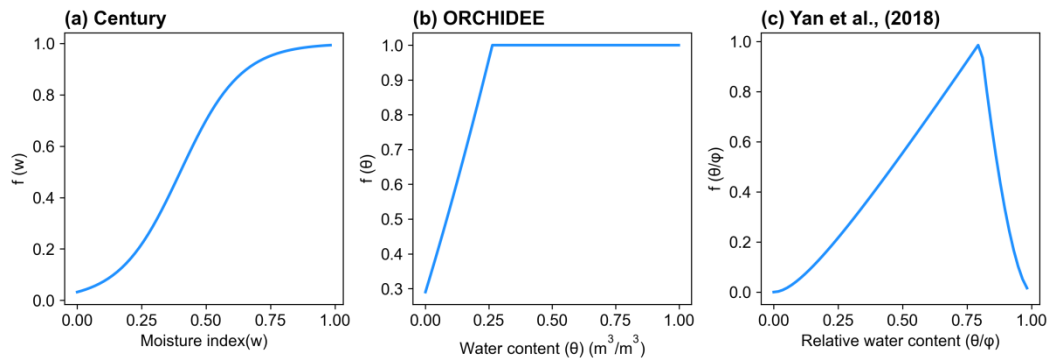

**Fig. S4** Soil moisture functions from (a) the Century model (Parton et al., 2000), (b) the ORCHIDEE-SOM model (Camino-Serrano et al., 2018) and (c) the mechanism-based soil moisture function from Yan et al. (2018).  $w$  is soil moisture indicator (AI, i.e., precipitation/potential evapotranspiration).  $\theta$  is soil water content,  $\phi$  is soil porosity, and  $\theta/\phi$  is relative water content.

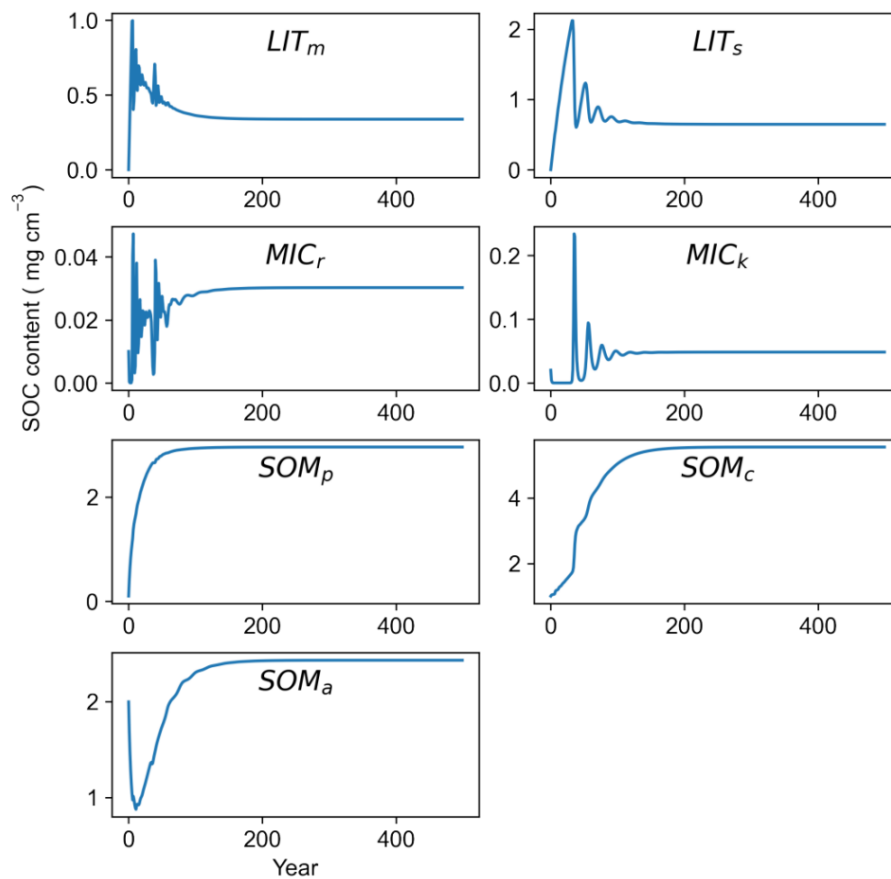

100

**Fig. S5** Temporal changes of seven SOC pools from a simulation of the MIMICS-TSM<sub>b</sub> version for 500 years using one random site (Lat, Lon =28.1 °N, 113.2 °E) as an example.



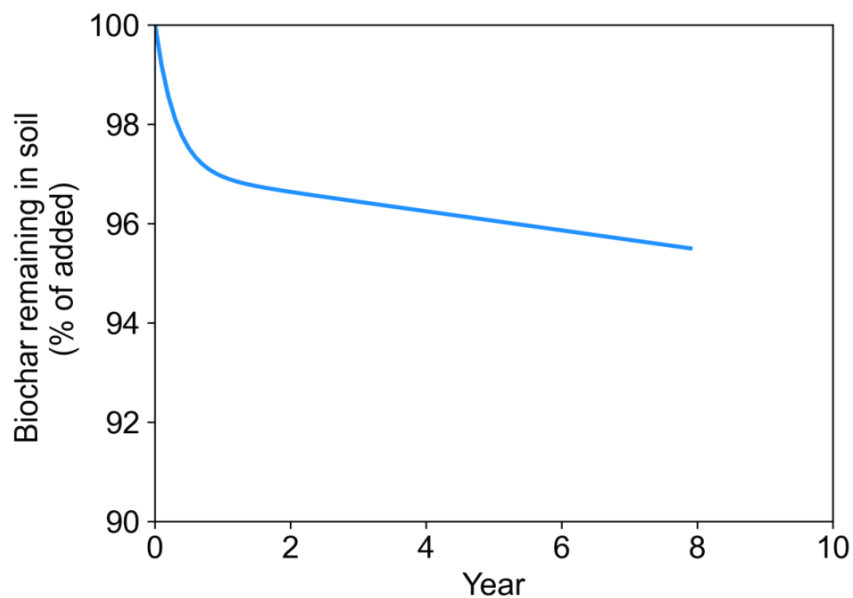

**Fig. S6** The biochar decomposition curve fitted with experimental data from Wang et al. (2016) using a double first-order exponential decay model ( $BC_{remain\%} = 3.02 \times e^{(-3.24 \times age_{bc})} + 97.02 \times e^{(-0.002 \times age_{bc})}$ ).

110

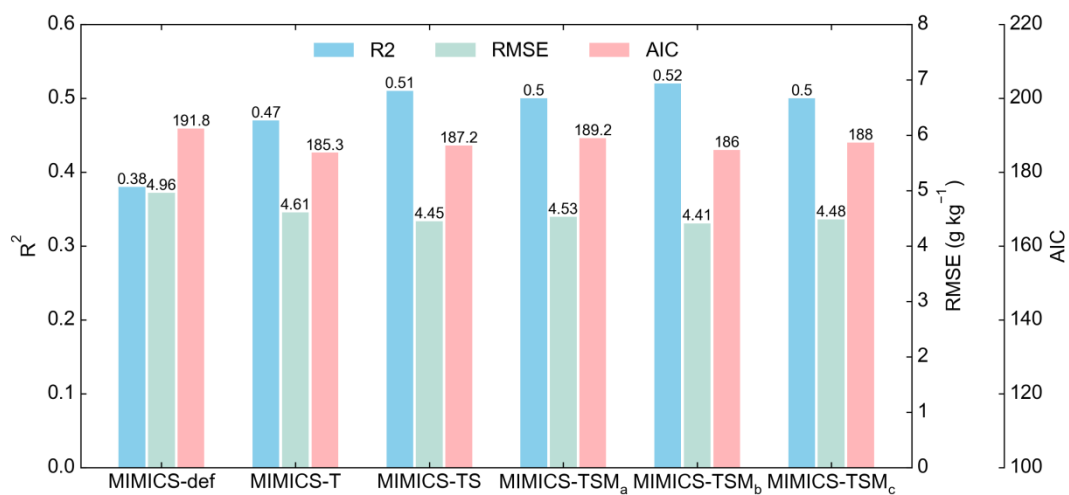

**Fig. S7** Comparison of R<sup>2</sup>, RMSE and AIC of all MIMICS versions.

115

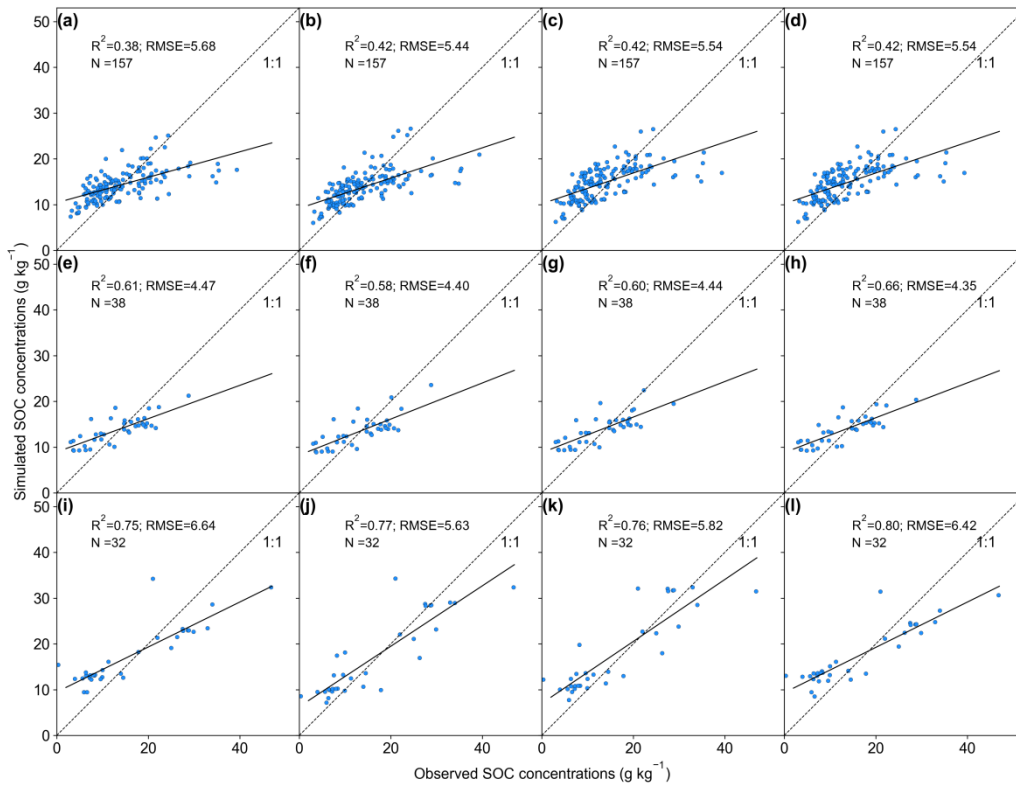

**Fig. S8** Relationship between observed and simulated SOC concentrations by MIMICS-def (a, e, i), MIMICS-T (b, f, j), MIMICS-TS (c, g, k) and MIMICS-TSM<sub>b</sub> (d, h, l). The observed SOC concentrations are from (a-d) Sun et al. (2020), (e-h) Geisseler et al. (2017), (i-l) Zhou et al. (2017). The unit of RMSE is g kg<sup>-1</sup>.

120

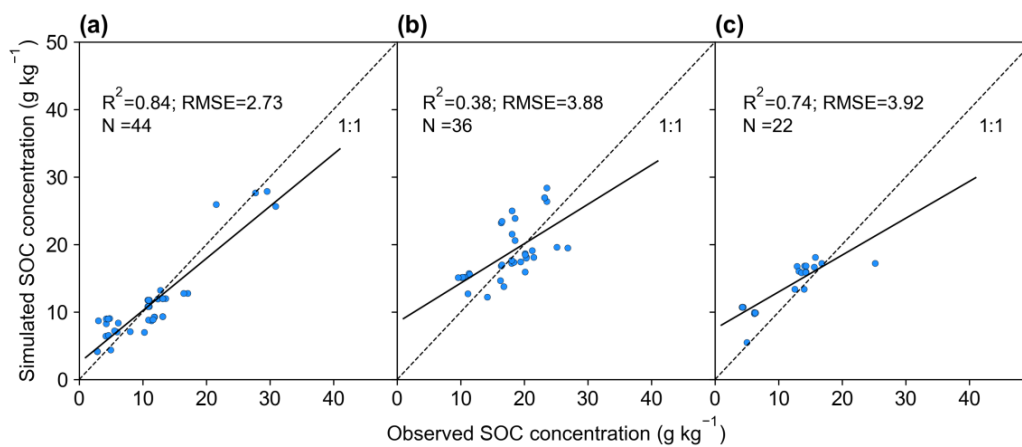

125

**Fig. S9** Relationship between observed and simulated SOC concentrations by MIMICS-TSM<sub>b</sub> for (a) maize, (b) rice and (c) wheat. The unit of RMSE is g kg<sup>-1</sup>.

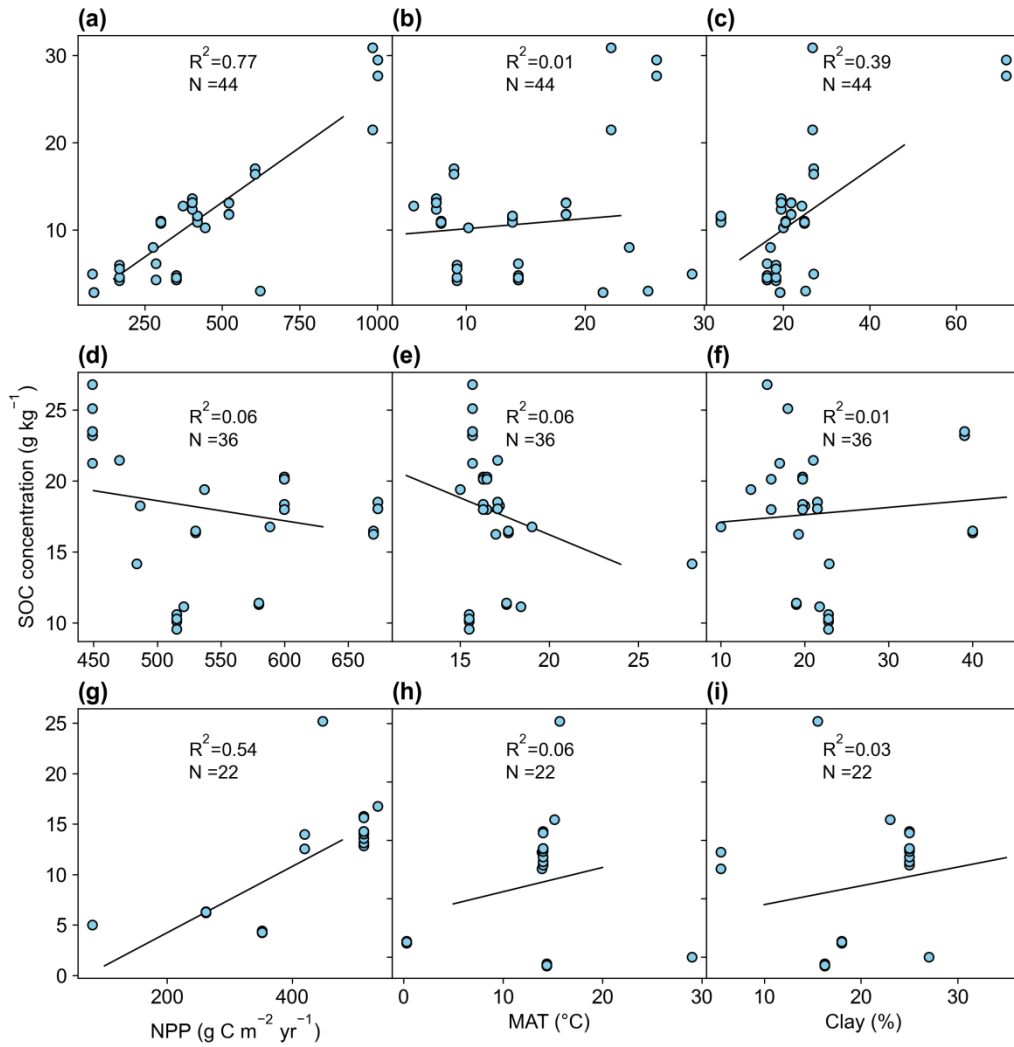

**Fig. S10** Correlation between SOC concentrations with NPP, MAT and Clay for maize (a-c), rice (d-f) and wheat (g-i).

130

135

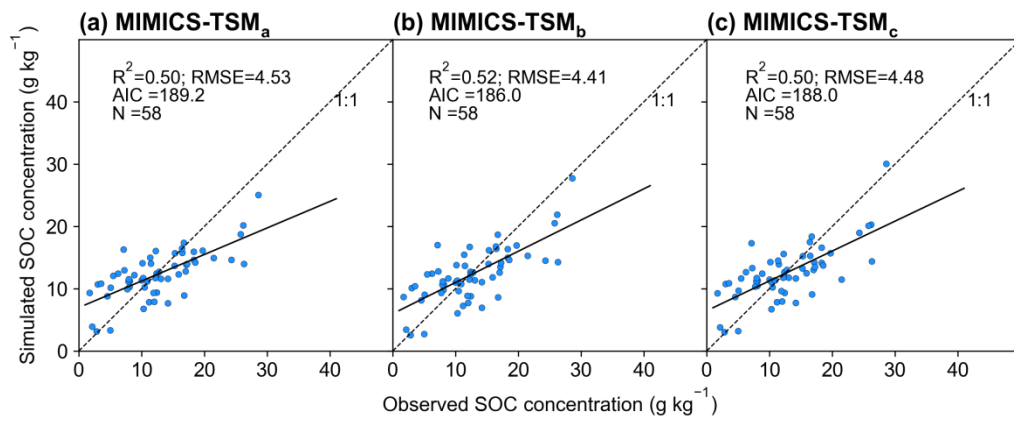

140

**Fig. S11** Relationships between observed and simulated SOC concentrations by (a) MIMICS-TSM<sub>a</sub>, (b) MIMICS-TSM<sub>b</sub> and (c) MIMICS-TSM<sub>c</sub>, respectively.

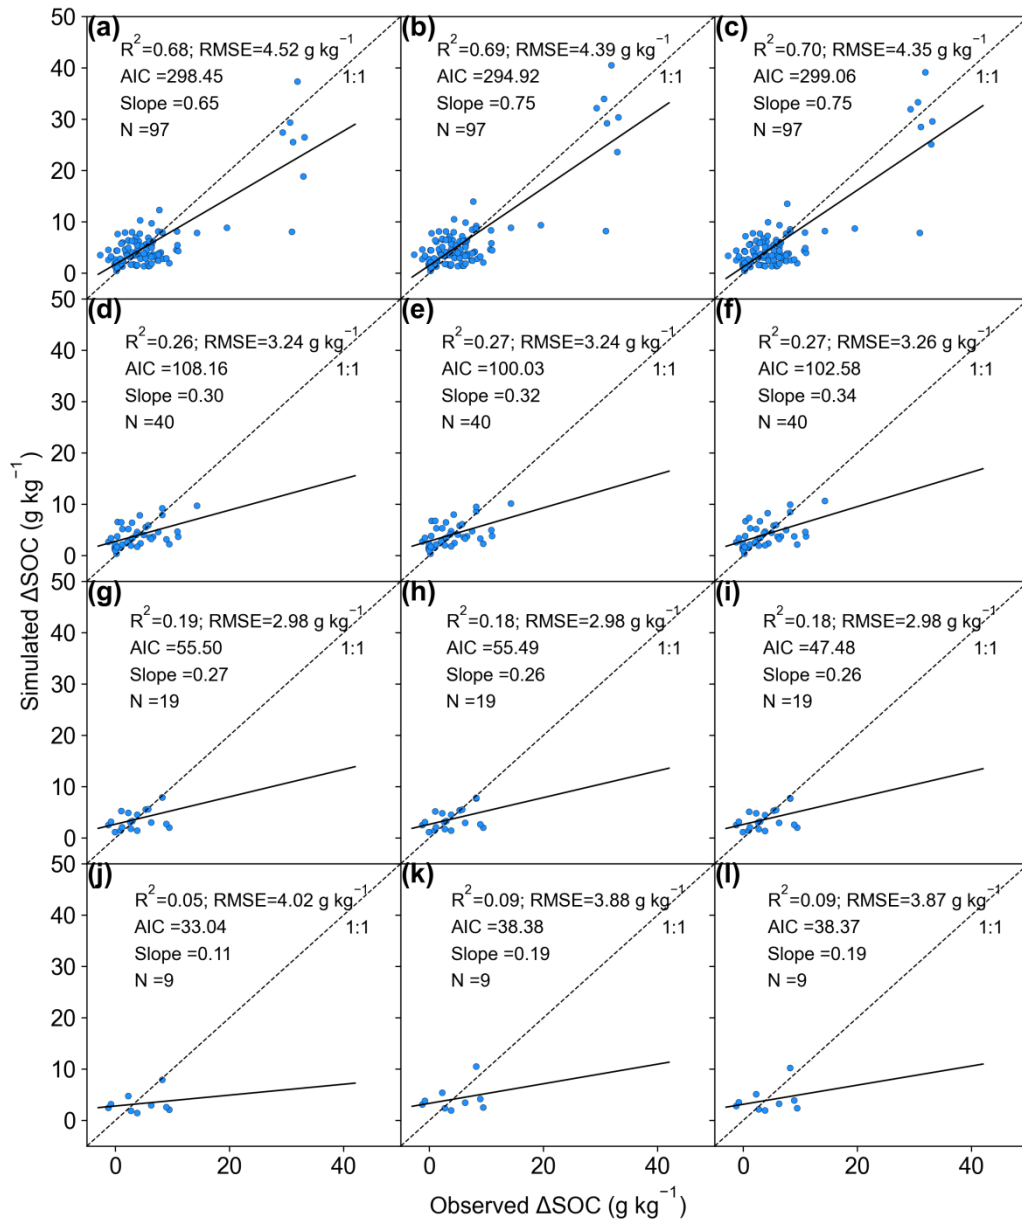

145

**Fig. S12** Relationship between observed and simulated SOC changes ( $\Delta\text{SOC}$ ) for data with  $\text{Age\_BC} \geq 3\text{yr}$  (a-c),  $\text{Age\_BC} \geq 4\text{yr}$  (d-f),  $\text{Age\_BC} \geq 5\text{yr}$  (g-i) and  $\text{Age\_BC} \geq 6\text{yr}$  (j-l) using three MIMICS versions: MIMICS-TSM<sub>b</sub> (a, d, g, j), MIMICS-BC<sub>D</sub> (b, e, h, k) and MIMICS-BC<sub>DV</sub> (c, f, i, l).

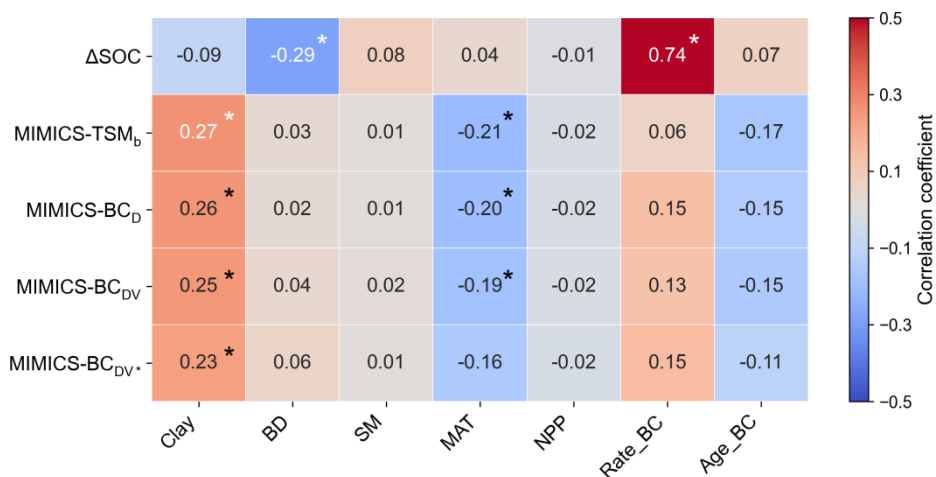

150

**Fig. S13** Correlations between the observed short-term SOC changes after biochar addition ( $\Delta$ SOC) and soil- (Clay, BD, SM), climate- (MAT), biological- (NPP) and biochar-related (Rate\_BC, Age\_BC) variables in first row. The other rows are for the  $\Delta$ SOC biases in short-term between observations and simulations by MIMICS-TSM<sub>b</sub>, MIMICS-BC<sub>D</sub>, MIMICS-BC<sub>DV</sub> and MIMICS-BC<sub>DV\*</sub>. MIMICS-BC<sub>DV\*</sub> is the version with four parameters optimized (i.e.,  $f_d$ ,  $f_v$ ,  $f_{bp}$ ,  $f_{ba}$ ). Asterisk indicates

155 significant correlations ( $p < 0.05$ ).

160

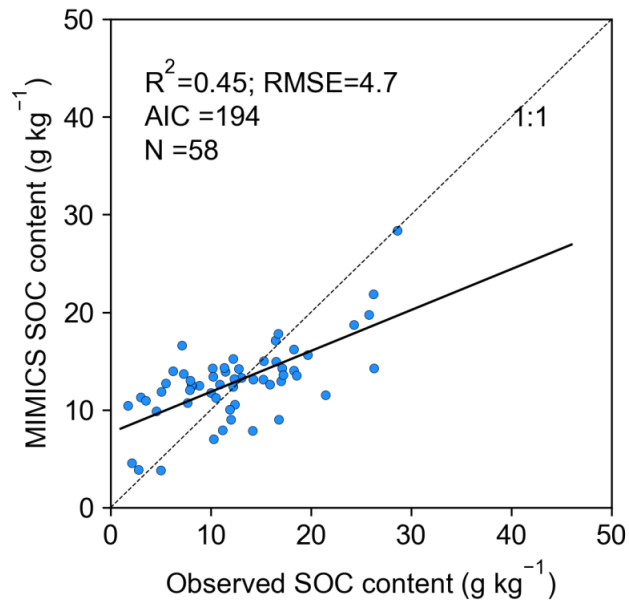

**Fig. S14** Relationships between observed and simulated SOC concentrations by MIMICS-TSM<sub>b</sub> assuming that the soil moist  
 165 factor ( $f_{m2}(\theta)$ , Eq. 11) were multiplied by  $V_{\max}$  and microbial turnover ( $\tau$ ) of MIC<sub>r</sub> and MIC<sub>k</sub>, instead of by  $V_{\max}$  and  $K_m$  in  
 Section 2.2.4.

170

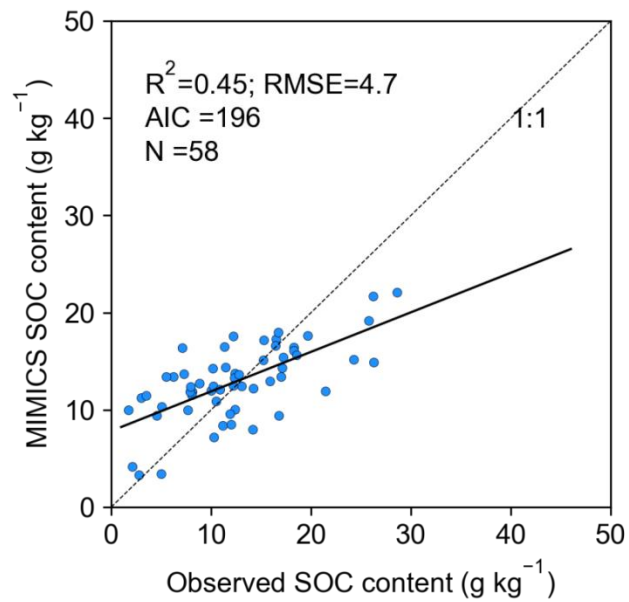

**Fig. S15** Relationships between observed and simulated SOC concentrations by MIMICS-TSM<sub>b</sub> with NPP optimized  
 additionally (i.e., total 8 parameters:  $a_v$ ,  $a_k$ ,  $k_d$ ,  $\beta$ ,  $k_{ba}$ ,  $c_1$ ,  $c_2$ ,  $f_{npp}$ ).

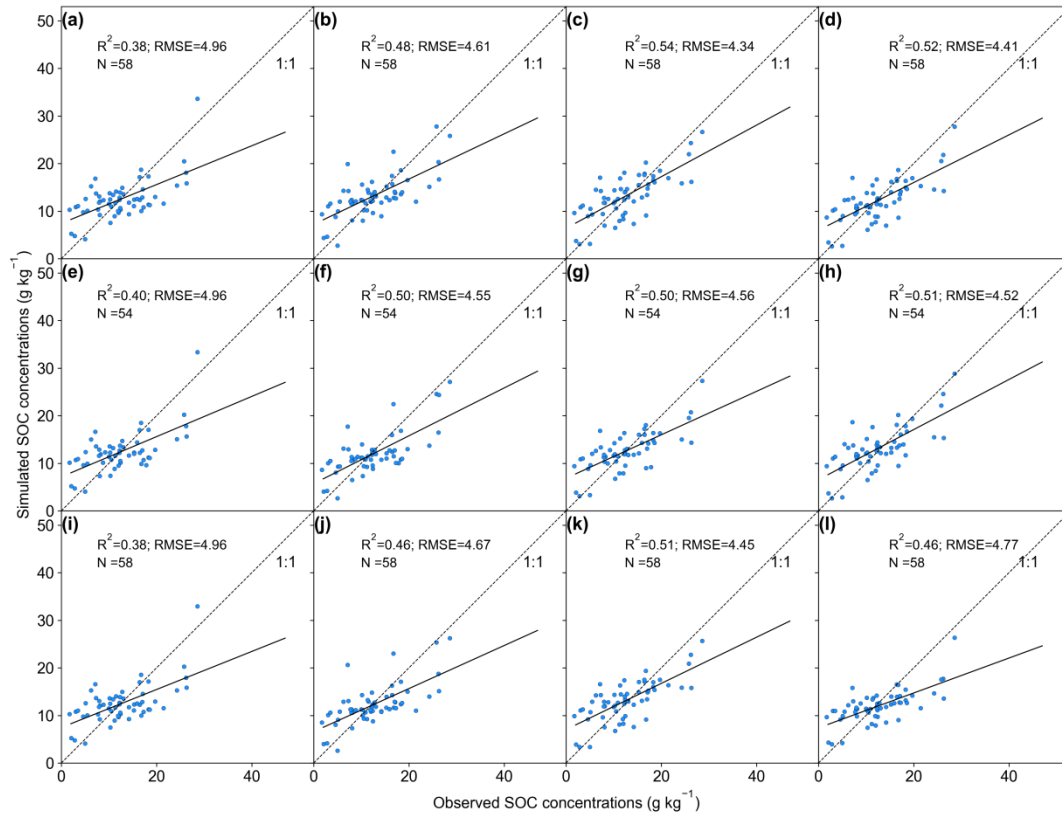

175

**Fig. S16** Relationships between observed and simulated SOC concentrations by MIMICS-def (a, e, i), MIMICS-T (b, f, j), MIMICS-TS (c, g, k) and MIMICS-TSM<sub>b</sub> (d, h, l). The MIMICS versions in the first row (a-d) used the reverse Michaelis-Menten kinetics in SOC decomposition processes. The MIMICS versions in the second row were validated against SOC concentrations aggregated within each 0.5 °grid cell. The MIMICS versions in the last row consider the tillage effects on

180 SOC by assuming a 30% increase in the deprotection rate of SOC<sub>p</sub>. The unit of RMSE is g kg<sup>-1</sup>.



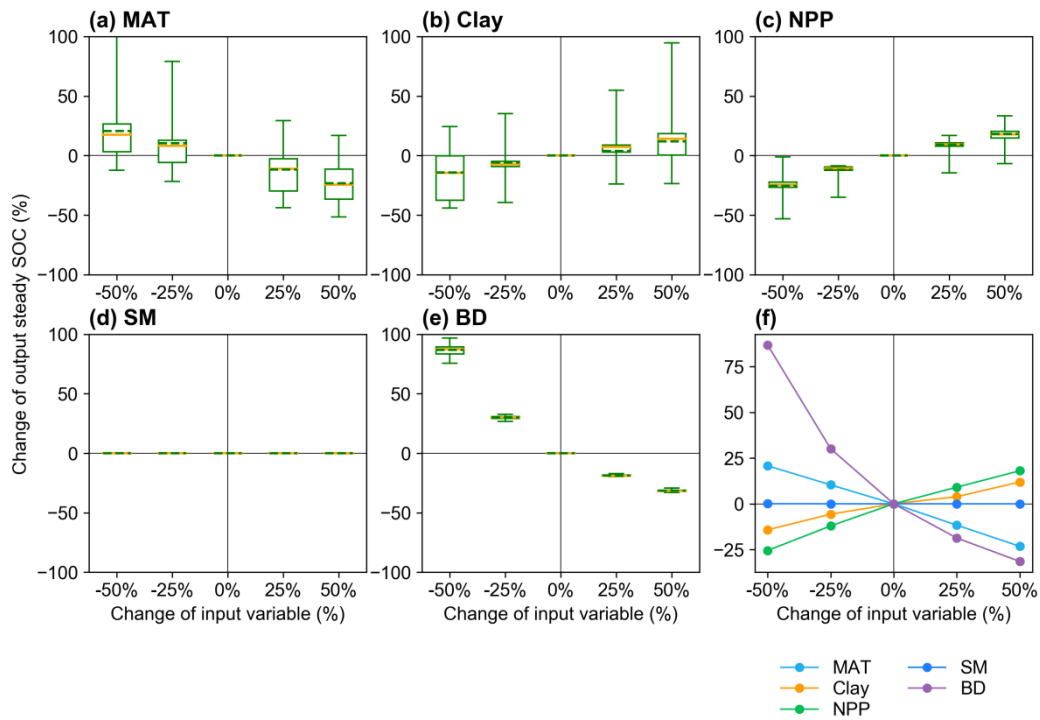

**Fig. S17** Sensitivity analysis of responses of the steady SOC simulated by MIMICS to input variables of (a) MAT, (b) Clay, (c) NPP, (d) SM and (e) BD with different perturbation levels. The yellow line and green dotted line in the boxplot are median and mean values of the output steady SOC changes in 58 sites. The average SOC changes in all sites for the four perturbation levels are shown in (f).

190

195

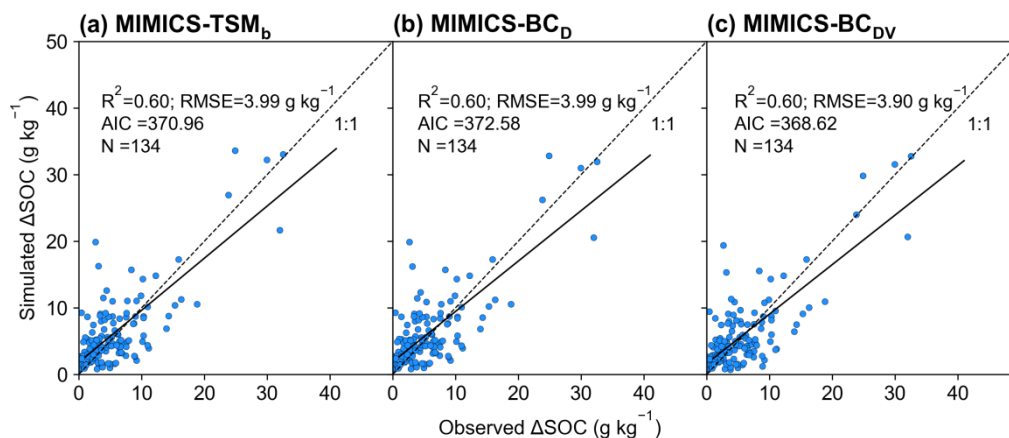

**Fig. S18** Relationships of short-term SOC changes after biochar addition between observations and models with (a) MIMICS-TSM<sub>b</sub>, (b) MIMICS-BC<sub>D</sub> and (c) MIMICS-BC<sub>DV</sub>. ( $f_{ba}=2\%$ )

200

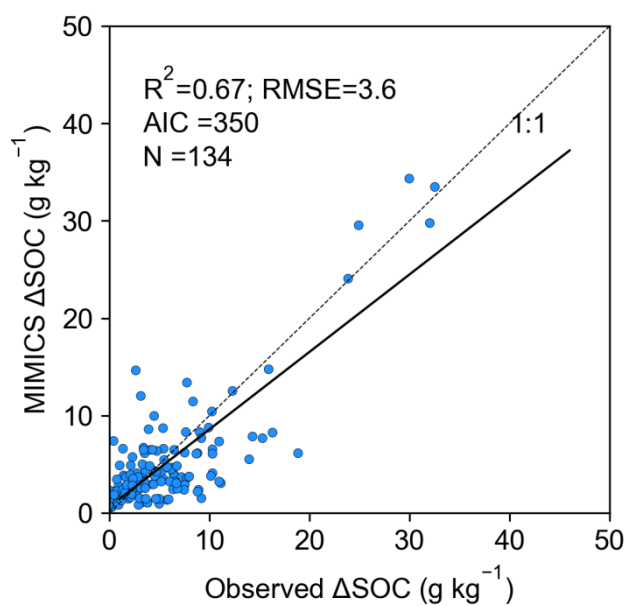

205 **Fig. S19** Relationships of short-term SOC changes after biochar addition between observations and models simulated with MIMICS-BC version with four parameters optimized ( $f_a=-0.0135$ ,  $f_v=0.0196$ ,  $f_{bp}=0.5957$  and  $f_{ba}=0.2906$ ). The unit of RMSE is  $\text{g kg}^{-1}$ .

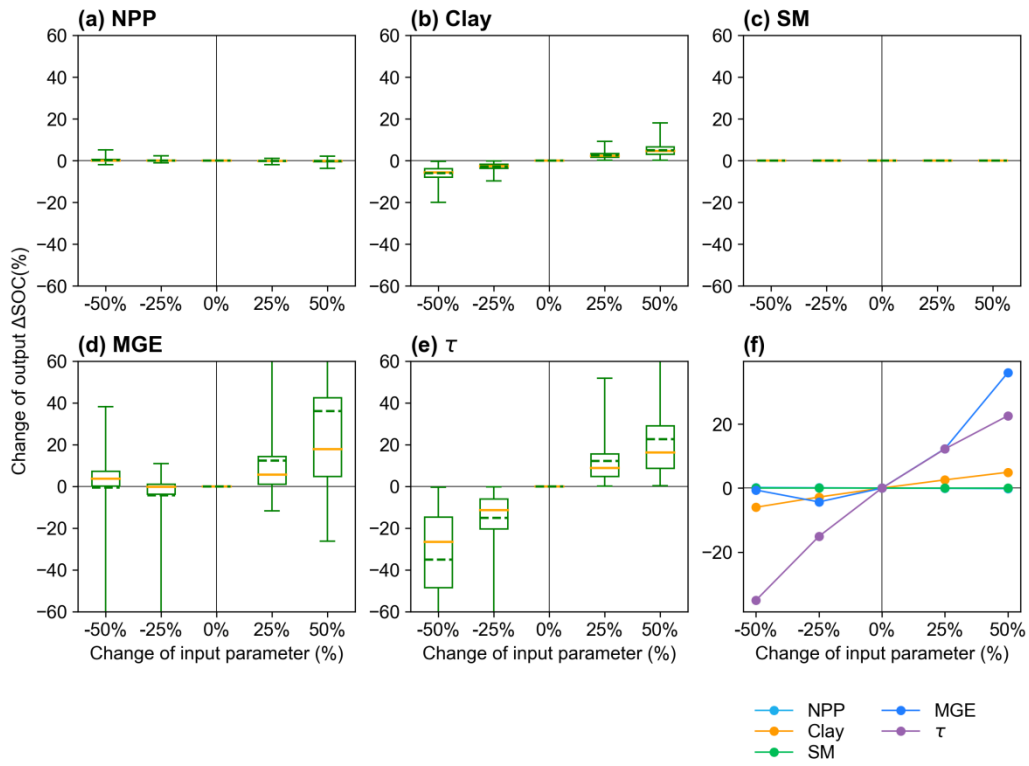

210 **Fig. S20** Sensitivity analysis of MIMICS-BC model input variables of (a) NPP, (b) Clay, (c) SM and parameters of (d) *MGE*  
 (microbial growth efficiency, Fig. S3) and (e)  $\tau$  (microbial biomass turnover, Fig. S3). The yellow line and green dotted line  
 in boxplot are median and mean values of output variable change (i.e., change of  $\Delta SOC$ , Eq. 19). The means of  $\Delta SOC$   
 changes with perturbations in all sites are plot in (f).

215

220

225

## References

- Abiven, S., Recous, S., Reyes, V., & Oliver, R.: Mineralisation of C and N from root, stem and leaf residues in soil and role of their biochemical quality, *Biology and Fertility of Soils*, *42*, 119-128, doi:10.1007/s00374-005-0006-0, 2005.
- 230 Archontoulis, S. V., Huber, I., Miguez, F. E., Thorburn, P. J., Rogovska, N., & Laird, D. A.: A model for mechanistic and system assessments of biochar effects on soils and crops and trade-offs, *GCB Bioenergy*, *8*, 1028-1045, doi:10.1111/gcbb.12314, 2016.
- Camino-Serrano, M., Guenet, B., Luysaert, S., Ciais, P., Bastrikov, V., De Vos, B., Gielen, B., Gleixner, G., Jornet-Puig, A., Kaiser, K., Kothawala, D., Lauerwald, R., Peñuelas, J., Schrumpf, M., Vicca, S., Vuichard, N., Walmsley, D., & Janssens, I. A.: ORCHIDEE-SOM: modeling soil organic carbon (SOC) and dissolved organic carbon (DOC) dynamics along vertical soil profiles in Europe, *Geoscientific Model Development*, *11*, 937-957, doi:10.5194/gmd-11-937-2018, 2018.
- 235 Geisseler, D., Linqvist, B. A., & Lazicki, P. A.: Effect of fertilization on soil microorganisms in paddy rice systems – A meta-analysis, *Soil Biology and Biochemistry*, *115*, 452-460, doi:10.1016/j.soilbio.2017.09.018, 2017.
- 240 German, D. P., Marcelo, K. R., Stone, M. M., & Allison, S. D.: The Michaelis-Menten kinetics of soil extracellular enzymes in response to temperature: a cross-latitudinal study, *Global Change Biology*, *18*, 1468-1479. 2012.
- Hicke, J. A., & Lobell, D. B.: Spatiotemporal patterns of cropland area and net primary production in the central United States estimated from USDA agricultural information, *Geophysical Research Letters*, *31*. 2004.
- 245 Mayes, M. A., Heal, K. R., Brandt, C. C., Phillips, J. R., & Jardine, P. M.: Relation between Soil Order and Sorption of Dissolved Organic Carbon in Temperate Subsoils, *Soil Science Society of America Journal*, *76*, 1027-1037, doi:10.2136/sssaj2011.0340, 2012.
- Parton, W. J., Morgan, J. A., Kelly, R. H., & Ojima, D.: Modeling soil C responses to environmental change in grassland systems[M] The potential of US grazing lands to sequester carbon and mitigate the greenhouse effect. 2000.
- 250 Ramankutty, N., Evan, A. T., Monfreda, C., & Foley, J. A.: Farming the planet: 1. Geographic distribution of global agricultural lands in the year 2000, *Global Biogeochemical Cycles*, *22*, doi:10.1029/2007gb002952, 2008.
- Sun, W., Canadell, J. G., Yu, L., Yu, L., Zhang, W., Smith, P., Fischer, T., & Huang, Y.: Climate drives global soil carbon sequestration and crop yield changes under conservation agriculture, *Glob Chang Biol*, *26*, 3325-3335, doi:10.1111/gcb.15001, 2020.
- 255 Wang, G., Huang, W., Zhou, G., Mayes, M. A., & Zhou, J.: Modeling the processes of soil moisture in regulating microbial and carbon-nitrogen cycling, *Journal of Hydrology*, *585*, doi:10.1016/j.jhydrol.2020.124777, 2020.
- Wang, J., Xiong, Z., & Kuzyakov, Y.: Biochar stability in soil: meta-analysis of decomposition and priming effects, *Global Change Biology Bioenergy*, *8*, 512-523, doi:10.1111/gcbb.12266, 2016.
- 260 Wieder, W. R., Grandy, A. S., Kallenbach, C. M., & Bonan, G. B.: Integrating microbial physiology and physio-chemical principles in soils with the Microbial-Mineral Carbon Stabilization (MIMICS) model, *Biogeosciences*, *11*, 3899-3917, doi:10.5194/bg-11-3899-2014, 2014.
- Wieder, W. R., Grandy, A. S., Kallenbach, C. M., Taylor, P. G., & Bonan, G. B.: Representing life in the Earth system with soil microbial functional traits in the MIMICS model, *Geoscientific Model Development*, *8*, 1789-1808, doi:10.5194/gmd-8-1789-2015, 2015.
- 265 Yan, Z., Bond-Lamberty, B., Todd-Brown, K. E., Bailey, V. L., Li, S., Liu, C., & Liu, C.: A moisture function of soil heterotrophic respiration that incorporates microscale processes, *Nat Commun*, *9*, 2562, doi:10.1038/s41467-018-04971-6, 2018.
- Zhang, H., Goll, D. S., Wang, Y. P., Ciais, P., Wieder, W. R., Abramoff, R., Huang, Y., Guenet, B., Prescher, A. K., Viscarra Rossel, R. A., Barre, P., Chenu, C., Zhou, G., & Tang, X.: Microbial dynamics and soil physicochemical properties explain large-scale variations in soil organic carbon, *Glob Chang Biol*, doi:10.1111/gcb.14994, 2020.
- 270 Zhou, M., Zhu, B., Wang, S., Zhu, X., Vereecken, H., & Bruggemann, N.: Stimulation of N<sub>2</sub>O emission by manure application to agricultural soils may largely offset carbon benefits: a global meta-analysis, *Glob Chang Biol*, *23*, 4068-4083, doi:10.1111/gcb.13648, 2017.
